# Supplementary material
Source: PubMed Central journal article supplement (PMC5125022)

## Supporting Information

# **6 $\beta$ -N-Heterocyclic Substituted Naltrexamine Derivative BNAP: A Peripherally Selective Mixed MOR/KOR Ligand**

Dwight A. Williams<sup>a,b</sup>, Yi Zheng<sup>a</sup>, Bethany G. David<sup>b</sup>, Yunyun Yuan<sup>a</sup>, Saheem A. Zaidi<sup>a</sup>, David L. Stevens<sup>b</sup>, Krista L. Scoggins<sup>b</sup>, Dana E. Selley<sup>b</sup>, William L. Dewey<sup>b</sup>, Hamid I. Akbarali<sup>b</sup>, Yan Zhang<sup>a\*</sup>

<sup>a</sup> Department of Medicinal Chemistry, Virginia Commonwealth University, 800 E. Leigh Street, Richmond, Virginia 23298, United States

<sup>b</sup> Department of Pharmacology and Toxicology, Virginia Commonwealth University, 410 North 12<sup>th</sup> Street, Richmond, Virginia 23298, United States

BNAP characterization (including original spectra):

$^1\text{H}$  NMR (400 MHz, DMSO- $d_6$ ):  $\delta$ , 9.39-9.42 (1H, d,  $J = 8.12$  Hz), 9.38–9.36 (2H, d,  $J = 6.84$  Hz), 9.01 (1H, s), 8.50 - 8.48 (2H, d,  $J = 6.8$  Hz), 7.48–7.25 (5H, m), 6.61 -6.59 (1H, d,  $J = 8.0$  Hz), 6.56 - 6.54 (1H, d,  $J = 8.1$  Hz), 5.92 (1H, s), 4.91 (1H, s), 4.65 - 4.64 (1H, d,  $J = 7.7$ ), 3.74 - 3.66 (1H, m), 3.04-2.96 (3H, m) 2.68 - 2.51 (2H, m), 2.39 - 2.30 (2H, m), 2.24 - 2.14 (1H, m), 2.02 - 1.84 (2H, m) 1.63 - 1.26 (4H, m), 0.89 - 0.80 (1H, m), 0.51 - 0.43 (2H, m) 0.14 - 0.11 (2H, m).

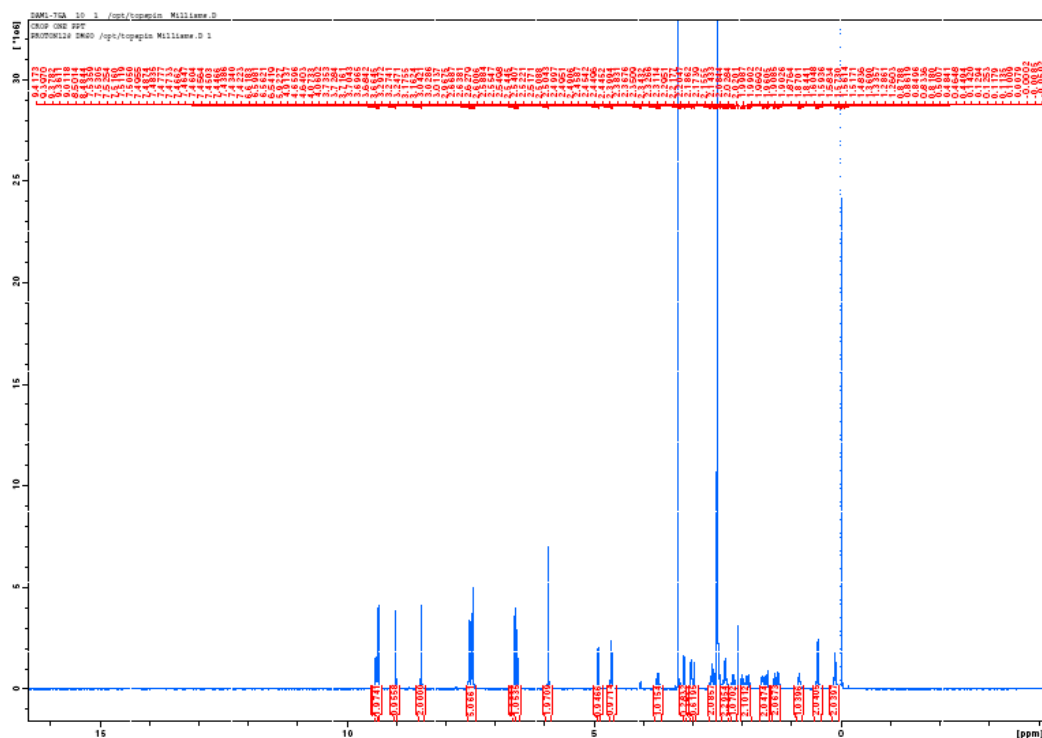

$^{13}\text{C}$  NMR (100 MHz, DMSO- $d_6$ )  $\delta$  161.1, 148.0, 145.8, 141.8, 141.1, 133.8, 129.4, 129.2, 128.7, 126.0, 120.6, 119.5, 117.8, 89.3, 69.5, 63.5, 61.6, 56.6, 51.8, 46.3, 45.5, 29.2, 27.1, 23.2, 22.9, 5.6, 5.0, 2.5.

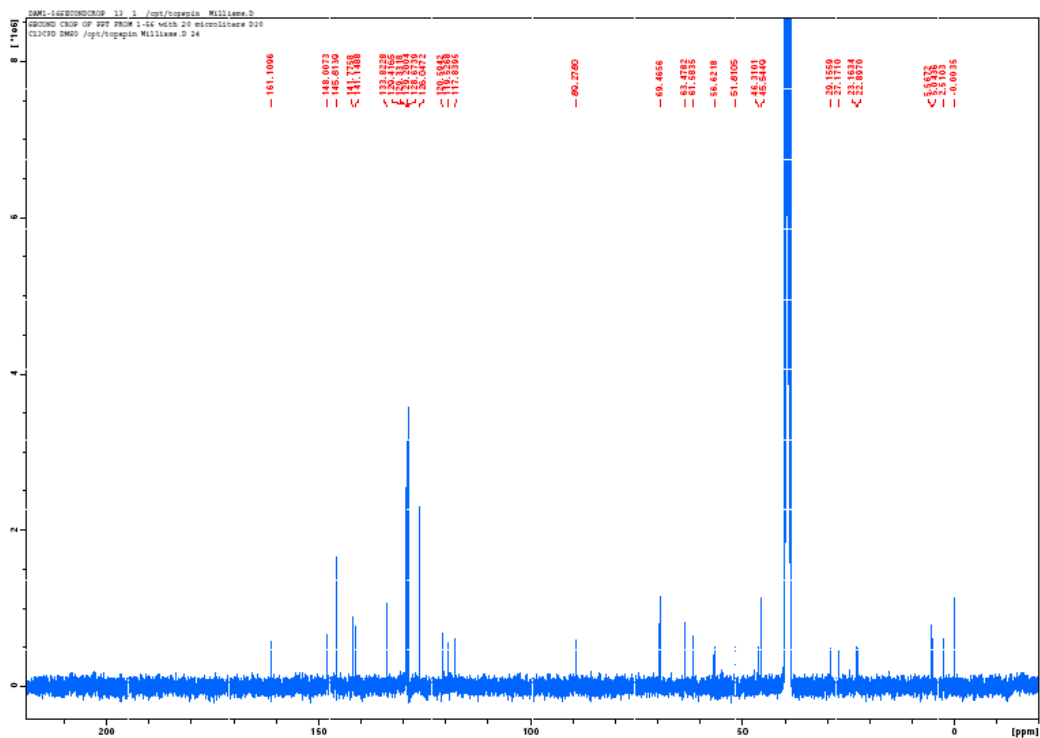

IR: 3433.29, 2251.06, 2125.05, 1661.09, 1052.38, 1023.83, 1004.68, 821.38, 758.75 .

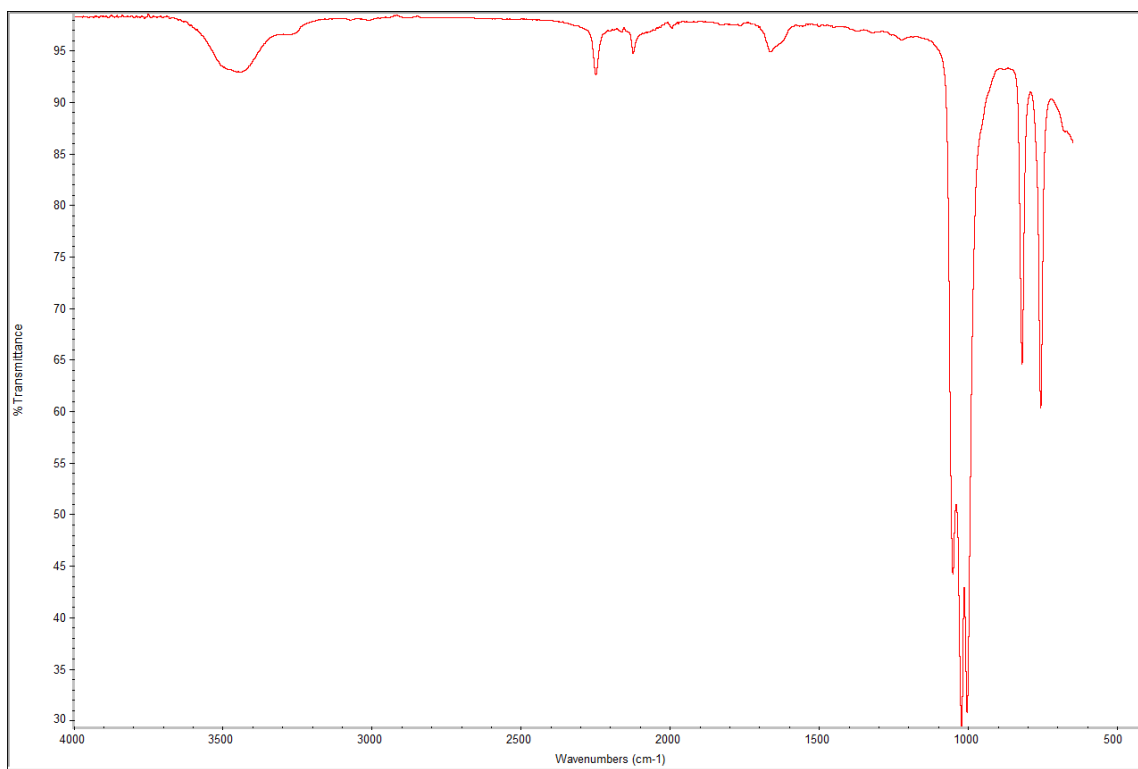

# HPLC:

File c:\star\data\dw\dw-1-75 230nm.run Filetype 325  
WTOASCII Parameters: C:\star\WTOASCII.TXT  
2 channels  
Channel 1 210 nm in AU  
Channel 2 230 nm in AU  
Base rate 5.0000 Hz Bunch 1 Effective rate 5.00000 Hz. T = 0.003333 min.  
4500 points from 0.000 to 15.000 minutes  
Sampling every 4 point(s)  
Printing points from 0.000 to 15.000 min, point 0 to 4499  
Channels 1 to 2  
No Results for Channel 1 - 210 nm  
Results for Channel 2 - 230 nm  
Title: Report Title  
Run File: c:\star\data\dw\dw-1-75 230nm.run

## Misc Info

Workstation: D92SSP71  
Bus Address: 44  
Run Time: 0.000 to 15.000 min.

## Recalc Info

Instrument: Varian Star #1

## Notes:

Sample Rate: 5.000 Hz  
Measurement Type: 1 - Area  
Calculation Type: 1 - %  
Normalize Results: No

## Peak Info for Channel 2

| 8 Peaks (tR Timeoffset RRT Sepcode Width Counts Result Name) |
|--------------------------------------------------------------|
| 0.036 0.000 0.0000 BB 2.96 6065 0.002550                     |
| 2.764 0.000 0.0000 BP 10.74 1117223 0.468161                 |
| 3.492 0.000 0.0000 FV 16.16 3707044 1.553399                 |
| 3.839 0.000 0.0000 VB 21.38 233770624 97.959175              |
| 12.131 0.000 0.0000 BB 14.64 12392 0.005193                  |
| 12.869 0.000 0.0000 BP 7.50 10432 0.004371                   |
| 13.633 0.000 0.0000 VP 0.00 6938 0.002907                    |
| 14.104 0.000 0.0000 FV 0.00 10130 0.004245                   |

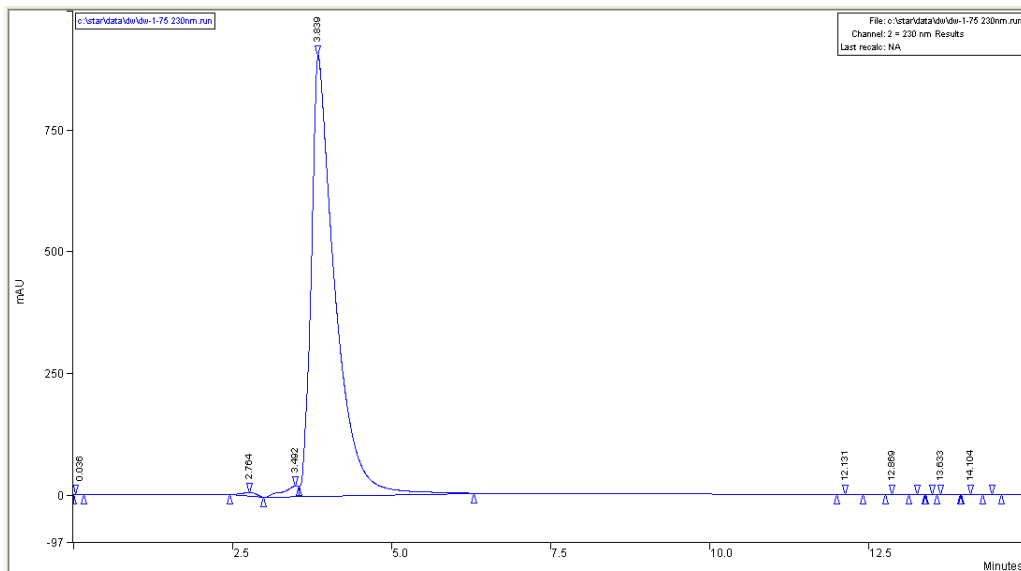

Mass Spectrum: m/z calc. 538.27 obs. 538.60

snapshot #1-25 RT: 0.01-0.32 AV: 25 NL: 1.36E7  
T: + p ESI Full ms [50.00-1000.00]

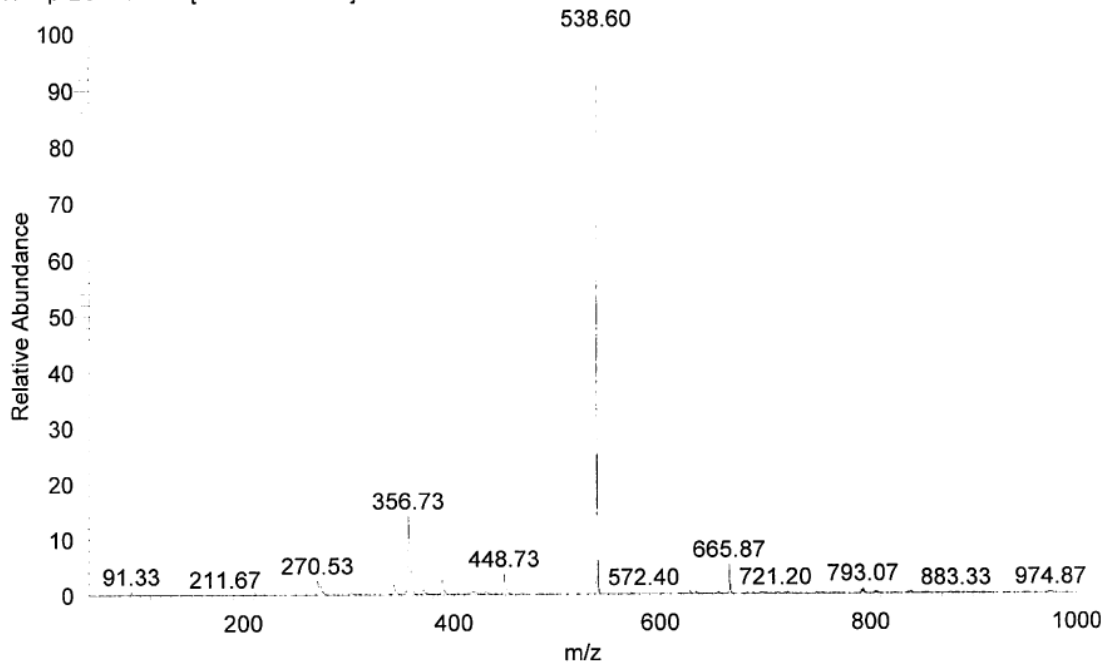

Supplement: NIHMS828990-supplement-SI.pdf [file NIHMS828990-supplement-SI.pdf]
